# Supplementary material
Source: MDPI journal article supplement (https://www.mdpi.com/2079-6412/13/12/1987)
Supplement: s1 [file s1]

## Supporting Information

# High-Performance $\epsilon$ -Ga<sub>2</sub>O<sub>3</sub> Solar-Blind Photodetectors Grown by MOCVD with Post-Thermal Annealing

ZeYuan Fei <sup>1</sup>, Zimin Chen <sup>1,\*</sup>, WeiQu Chen <sup>1</sup>, Tiecheng Luo <sup>1</sup>, Shujian Chen <sup>1</sup>, Jun Liang <sup>1,2,\*</sup>, Xinzhong Wang <sup>2</sup>, Xing Lu <sup>1</sup>, Gang Wang <sup>1,3</sup> and Yanli Pei <sup>1,3,\*</sup>

<sup>1</sup> State Key Laboratory of Optoelectronic Materials and Technologies, School of Electronics and Information Technology, Sun Yat-Sen University, HEMC, Guangzhou 510275, China; feizy@mail3.sysu.edu.cn (Z.F.); chenwq59@mail2.sysu.edu.cn (W.C.); luotch3@mail2.sysu.edu.cn (T.L.); chenshj65@mail2.sysu.edu.cn (S.C.); lux86@mail.sysu.edu.cn (X.L.); stswangg@mail.sysu.edu.cn (G.W.)

<sup>2</sup> Shenzhen Institute of Information Technology, Shenzhen 518172, China; wangxz@szit.com.cn

<sup>3</sup> Foshan Institute, Sun Yat-Sen University, Foshan 528225, China

\* Correspondence: chenzim8@mail.sysu.edu.cn (Z.C.); liangjun@szit.edu.cn (J.L.); peiyanli@mail.sysu.edu.cn (Y.P.)

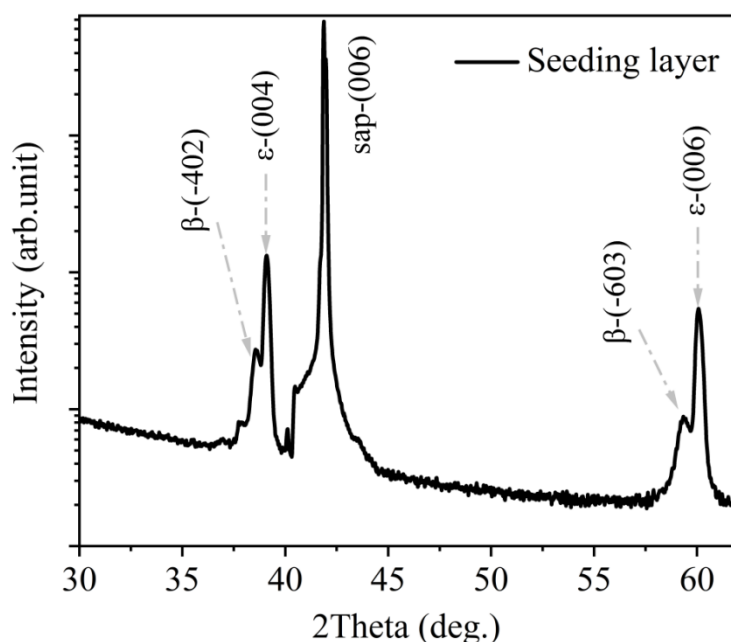

Figure S1. XRD patterns of the  $\epsilon$ -Ga<sub>2</sub>O<sub>3</sub> seeding layer growth on c-plane sapphire
